# Supplementary material
Source: MDPI journal article supplement (https://www.mdpi.com/2076-3417/13/21/12087)
Supplement: s1 [file s1]

**Supplementary results for the cutoff points of the artificial intelligence program  
(MammoScreen suspicion score results)**

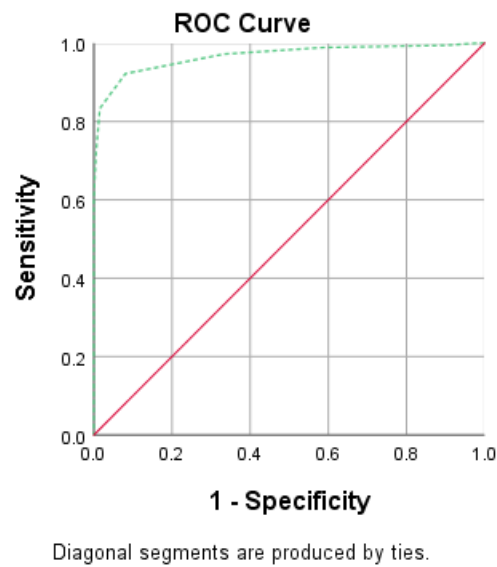

**Figure S1:** Area under the ROC curve for AI MammoScreen\_score

**Table S1:** Accuracy measures of the cutoff points  $\geq 5$

**Area under the Curve**

Test Result Variable: AI MammoScreen\_score

| Area | Std. Error <sup>a</sup> | Asymptotic Sig. <sup>b</sup> | Asymptotic 95% Confidence Interval |             |
|------|-------------------------|------------------------------|------------------------------------|-------------|
|      |                         |                              | Lower Bound                        | Upper Bound |
| .967 | .009                    | .0001                        | .949                               | .985        |

The test result variable AI MammoScreen\_score had at least one tie between the positive actual and negative actual state groups. The statistical data may be biased.

a. Under the nonparametric assumption

b. Null hypothesis: true area = 0.5

| Cutoff point for the AI system | Sensitivity | Specificity | AUROC |
|--------------------------------|-------------|-------------|-------|
| $\geq 5$                       | 97.2%       | 66.7%       | .967  |
| $\geq 6$                       | 92.8%       | 91.9%       |       |
